# Supplementary material for: Synthesis, Multinuclear NMR Characterization and Dynamic Property of Organic–Inorganic Hybrid Electrolyte Membrane Based on Alkoxysilane and Poly(oxyalkylene) Diamine
Source: PubMed Central journal article supplement (PMC4021892; doi:10.3390/membranes2020253), 2012-06-13
Supplement: membranes-02-00253-s001.pdf [file membranes-02-00253-s001.pdf]

Article

## Synthesis, Multinuclear NMR Characterization and Dynamic Property of Organic-Inorganic Hybrid Electrolyte Membrane Based on Alkoxysilane and Poly(oxyalkylene) Diamine

Diganta Saikia, Yu-Chi Pan and Hsien-Ming Kao \*

Department of Chemistry, National Central University, Chung-Li 32001, Taiwan;  
E-Mails: diganta\_s@yahoo.com (D.S.); yuchipan421@gmail.com (Y.-C.P.)

\* Author to whom correspondence should be addressed; E-Mail: hmkao@cc.ncu.edu.tw;  
Tel.: +886-3-427-5054; Fax: +886-3-422-7664.

Received: 27 April 2012; in revised form: 1 June 2012 / Accepted: 4 June 2012 /

Published:

---

**Abstract:** Organic-inorganic hybrid electrolyte membranes based on poly(propylene glycol)-*block*-poly(ethylene glycol)-*block*-poly(propylene glycol) bis(2-aminopropyl ether) complexed with LiClO<sub>4</sub> via the co-condensation of tetraethoxysilane (TEOS) and 3-(triethoxysilyl)propyl isocyanate have been prepared and characterized. A variety of techniques such as differential scanning calorimetry (DSC), Fourier transform infrared (FTIR) spectroscopy, alternating current (AC) impedance and solid-state nuclear magnetic resonance (NMR) spectroscopy are performed to elucidate the relationship between the structural and dynamic properties of the hybrid electrolyte and the ion mobility. A VTF (Vogel-Tamman-Fulcher)-like temperature dependence of ionic conductivity is observed for all the compositions studied, implying that the diffusion of charge carriers is assisted by the segmental motions of the polymer chains. A maximum ionic conductivity value of  $5.3 \times 10^{-5} \text{ Scm}^{-1}$  is obtained at 30 °C. Solid-state NMR results provide a microscopic view of the effects of salt concentrations on the dynamic behavior of the polymer chains.

**Keywords:** organic-inorganic hybrid electrolyte; ionic conductivity; poly(oxyalkylene) diamine; segmental motion

---

**Figure S1.** DSC thermograms of TIE(600)-Z hybrid electrolytes with various [O]/[Li] ratios, where Z = (a)  $\infty$ , (b) 32, (c) 24, (d) 16 and (e) 8.

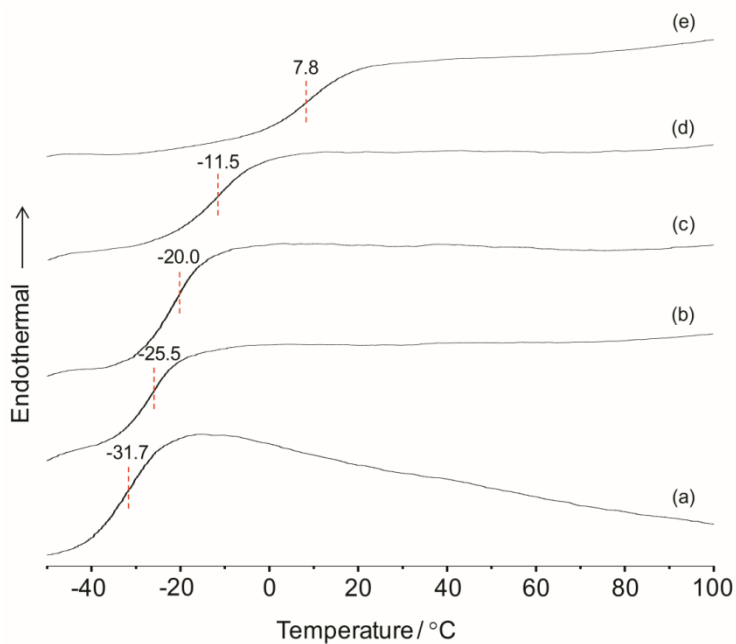

**Figure S2.** Temperature dependence of ionic conductivity of TIE(600)-Z hybrid electrolytes with Z = (a) 32, (b) 24, (c) 16 and (d) 8.

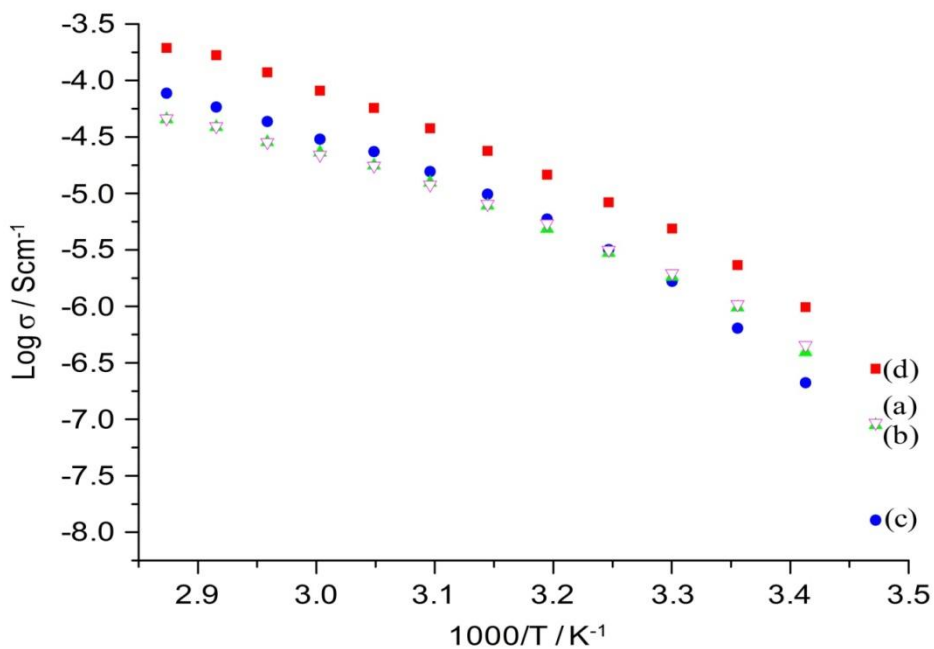

**Figure S3.** VTF curve fitting results of TIE(2000)-Z hybrid electrolytes with Z = (a) 32, (b) 24, (c) 16 and (d) 8.

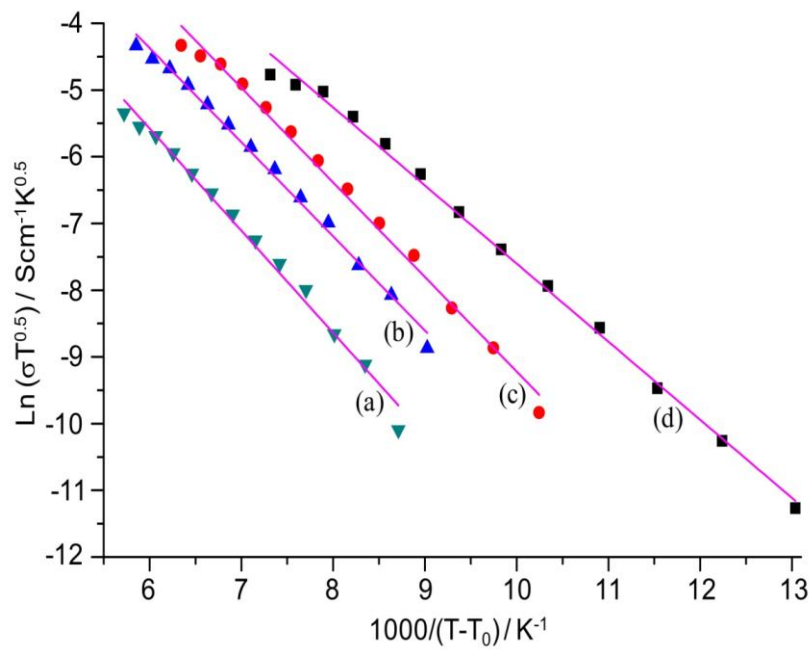

© 2012 by the authors; licensee MDPI, Basel, Switzerland. This article is an open access article distributed under the terms and conditions of the Creative Commons Attribution license (<http://creativecommons.org/licenses/by/3.0/>).
